# Supplementary material for: An efficient approach for the photodegradation of organic pollutants by immobilized iron ions at neutral pHsElectronic supplementary information (ESI) available: experimental details and XPS spectra of the Fe 2p3/2 region for the FeIII-resin catalyst before and after degradation of MG. See http://www.rsc.org/suppdata/cc/b3/b304309f/
Source: Royal Society of Chemistry journal article supplement (doi:10.1039/b304309f), 2003-01-01
Supplement: b304309f.doc [file b304309f.doc]

# Supplementary data

*Reaction system:* A Pyrex glass vessel containing substrate (0.2 mM in 50 ml water), H2O2  (10 mM) and catalyst (2.5 mg) was magnetically stirred and irradiated by a 100 W mercury lamp (cut-off at **  310nm by the Pyrex glass). Before addition of H2O2, the suspension was magnetically stirred in the dark for 8 hours to ensure the establishment of an adsorption equilibrium. MG concentration was determined by its absorbance at 616 nm, and other substrates were monitored by HPLC (ODS-3 5m column, methanol-water eluent). H2O2 was analyzed spectrophotometrically by a DPD method.[1]

1 T. Wu, G. Liu, J. Zhao, H. Hidaka, N. Serpone, *J. Phys. Chem. B,* 1999**, 103**, 4862-4867

Amberlite IRA 200 resin (Alfa Aesar Co., ground and sieved to 200 mesh) was pre-treated with, in turn, alcohol, HCl, NaOH and water to remove the impurities. The pretreated resin was then added to aqueous Fe(ClO4)3 solution at a suitable concentration and stirred until full exchange (the Fe ion in the filtrate was detected using the ferrozine method). The catalyst was filtered, washed with water and dried in air. Following this procedure, the loaded catalysts with different degrees of exchange (20%, 50% and 100%) were prepared (the exchange capacity was about 1mmol FeIII/g resin). Since the 50% Fe-loaded resin exhibited the highest activity, this catalyst was employed in this study.
