# Supplementary material for: An efficient approach for the photodegradation of organic pollutants by immobilized iron ions at neutral pHsElectronic supplementary information (ESI) available: experimental details and XPS spectra of the Fe 2p3/2 region for the FeIII-resin catalyst before and after degradation of MG. See http://www.rsc.org/suppdata/cc/b3/b304309f/
Source: Royal Society of Chemistry journal article supplement (doi:10.1039/b304309f), 2003-01-01
Supplement: b304309f.pdf [file b304309f.pdf]

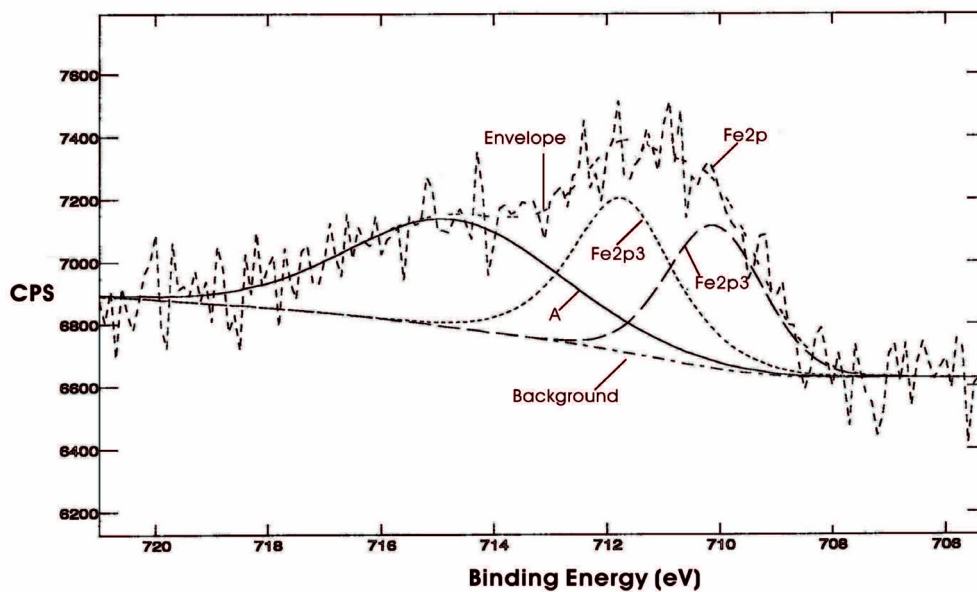

A: XPS spectra of the Fe  $2p_{2/3}$  region for resin/ $Fe^{3+}$  catalyst before use. The Gaussian-Lorentzian fitting of the experimental curves is also shown.

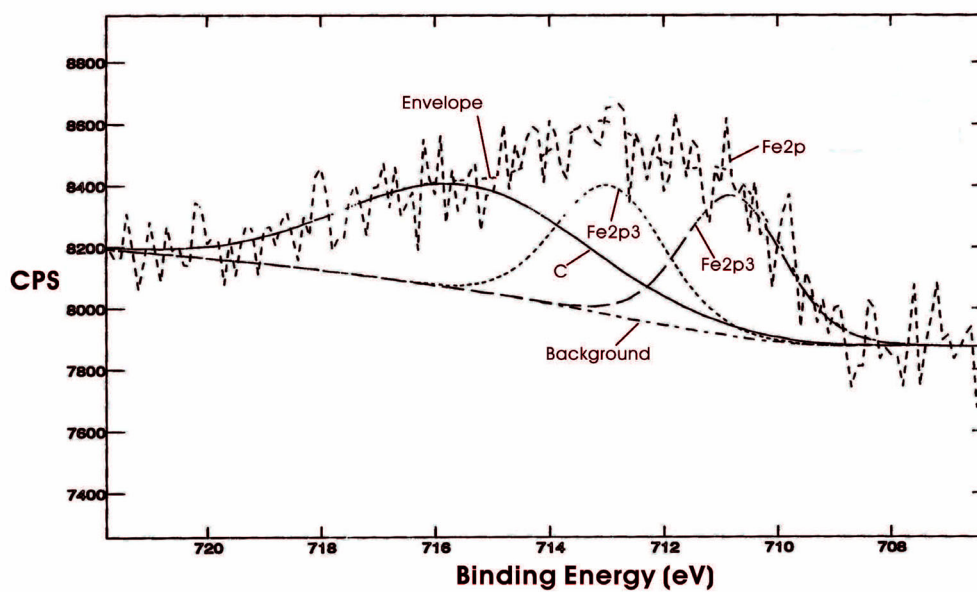

B: XPS spectra of the Fe  $2p_{2/3}$  region for resin/ $Fe^{3+}$  catalyst after use for degradation of 0.2mM MG by 0.5 mM  $H_2O_2$  (total volume 50ml, initial pH 6.0).
